# Supplementary material for: Genetic Diversity and Low Therapeutic Impact of Variant-Specific Markers in HIV-1 Pol Proteins
Source: Front Microbiol. 2022 Jul 14;13:866705. doi: 10.3389/fmicb.2022.866705 (PMC9330395; doi:10.3389/fmicb.2022.866705)
Supplement: Supplementary file 5 [file Table_5.XLSX]

## Sheet: Sheet1
Supplementary Table 5. Wu Kabat variability coefficient (V = N x k/n) along the PR, RT, and IN residues in all available LANL sequences ascribed to HIV-1 group M variants for the three proteins (26,988 in PR, 2,044 in RT, and 1,507 in IN).
N, number of sequences in the alignment, k: number of different aa at a given position, n: frequency of the most common aa at that position.
Protease		Reverse Transcriptase		Integrase
Site	V	Site	V	Site	V
1	8.011	1	3.001	1	3.002
2	11.019	2	5.008	2	4.002
3	11.047	3	4.003	3	6.15
4	14.067	4	8.245	4	4.007
5	8.01	5	6.088	5	6.008
6	8.008	6	14.481	6	9.335
7	11.034	7	8.035	7	7.234
8	9.008	8	4.136	8	3.002
9	10.004	9	4.004	9	6.006
10	18.266	10	4.007	10	7.31
11	15.109	11	17.213	11	10.422
12	23.429	12	3.001	12	4.004
13	16.428	13	5.008	13	8.151
14	17.909	14	7.02	14	10.299
15	16.958	15	3.001	15	5.004
16	13.74	16	6.013	16	7.011
17	10.163	17	4.002	17	7.21
18	19.28	18	2	18	7.012
19	22.989	19	3.001	19	2
20	13.573	20	6.598	20	4.295
21	10.026	21	3.095	21	7.583
22	9.01	22	4.031	22	5.038
23	7.006	23	5.003	23	6.41
24	8.006	24	2	24	13.395
25	9.01	25	2.001	25	8.745
26	7.003	26	2	26	3.003
27	3	27	5.059	27	10.166
28	9.005	28	7.162	28	6.254
29	8.005	29	5.006	29	2
30	9.01	30	6.007	30	7.065
31	8.008	31	4.016	31	6.665
32	7.005	32	8.292	32	3.212
33	8.211	33	3.001	33	4.005
34	8.035	34	4.008	34	3.069
35	26.217	35	18.338	35	5.03
36	17.751	36	15.079	36	4.003
37	24.998	37	5.004	37	6.103
38	13.05	38	3.001	38	7.019
39	14.57	39	36.497	39	12.401
40	6.002	40	10.495	40	5.007
41	23.357	41	5.04	41	8.291
42	6.005	42	3.002	42	5.369
43	10.262	43	11.5	43	3.002
44	5.001	44	4.016	44	4.005
45	10.368	45	5.005	45	10.966
46	7.053	46	5.007	46	4.003
47	6.003	47	4.008	47	2.001
48	6.004	48	10.466	48	6.016
49	5.003	49	5.362	49	6.023
50	8.005	50	3.039	50	9.078
51	5.002	51	4.002	51	7.02
52	5.001	52	4.002	52	2.001
53	6.004	53	4.117	53	4.008
54	10.032	54	4.003	54	3.012
55	11.035	55	2.001	55	5.013
56	11.005	56	2	56	7.034
57	10.431	57	2	57	5.072
58	8.034	58	3.001	58	3.001
59	8.008	59	3.001	59	4.013
60	11.154	60	4.682	60	5.211
61	13.739	61	2	61	2
62	16.565	62	6.047	62	3.002
63	52.598	63	4.002	63	4.142
64	11.582	64	3.043	64	4.003
65	12.426	65	3.004	65	3.001
66	10.015	66	3.003	66	5.005
67	15.52	67	3.017	67	2
68	8.046	68	6.281	68	7.128
69	34.995	69	8.162	69	4.003
70	16.57	70	4.015	70	8.055
71	11.949	71	3.001	71	5.048
72	16.925	72	4.004	72	13.597
73	8.012	73	3.001	73	4.009
74	12.365	74	3.002	74	5.629
75	6.022	75	6.015	75	4.005
76	5.001	76	3.002	76	4.003
77	9.936	77	3.003	77	5.019
78	6.003	78	3.001	78	5.007
79	11.05	79	5.005	79	5.01
80	7.002	80	3.001	80	5.008
81	5.001	81	3.001	81	3.003
82	11.558	82	3.011	82	4.007
83	13.02	83	3.124	83	2.001
84	7.01	84	4.002	84	4.617
85	10.018	85	2.001	85	4.003
86	9.006	86	4.023	86	3.001
87	11.013	87	4.004	87	4.003
88	11.019	88	6.047	88	7.201
89	19.083	89	3.001	89	6.018
90	9.051	90	3.047	90	5.066
91	8.038	91	4.003	91	7.353
92	14.133	92	1	92	6.007
93	24.386	93	2	93	5.014
94	13.01	94	4.003	94	3.003
95	12.024	95	1	95	10.193
96	8.009	96	4.003	96	5.102
97	11.025	97	1	97	4.055
98	12.024	98	4.122	98	4.01
99	11.062	99	2	99	6.072
		100	4.003	100	9.478
		101	7.122	101	10.877
		102	9.471	102	4.004
		103	6.201	103	4.032
		104	6.166	104	3.002
		105	5.011	105	4.006
		106	5.112	106	5.077
		107	3.026	107	4.003
		108	3.01	108	2
		109	2	109	2.001
		110	2.001	110	4.005
		111	4.043	111	10.543
		112	3.001	112	13.356
		113	2	113	5.81
		114	2.001	114	2
		115	2	115	6.015
		116	4.005	116	3.003
		117	2	117	4.003
		118	4.138	118	3.001
		119	3.001	119	11.429
		120	1	120	2
		121	12.739	121	4.003
		122	17.614	122	6.414
		123	28.862	123	4.01
		124	2	124	16.568
		125	4.008	125	13.16
		126	3.005	126	9.459
		127	2.001	127	6.086
		128	4.003	128	3.011
		129	2	129	4.005
		130	3.001	130	5.003
		131	3.002	131	1
		132	5.011	132	4.003
		133	1	133	3.003
		134	5.009	134	13.214
		135	13	135	7.228
		136	1	136	29.249
		137	3.002	137	6.018
		138	7.218	138	6.056
		139	10.191	139	5.035
		140	1	140	3.001
		141	4.003	141	6.036
		142	10.819	142	5.005
		143	3.001	143	3.002
		144	5.004	144	4.003
		145	5.016	145	3.001
		146	3.001	146	2
		147	6.007	147	3.002
		148	1	148	3.002
		149	3.001	149	4.003
		150	1	150	4.01
		151	3.004	151	5.063
		152	2	152	6.014
		153	1	153	7.032
		154	2.001	154	5.13
		155	2	155	5.005
		156	2.001	156	7.424
		157	2.001	157	9.176
		158	6.237	158	2
		159	3.021	159	3.002
		160	3.001	160	7.212
		161	2.001	161	7.04
		162	20.397	162	5.022
		163	4.014	163	13.713
		164	2	164	4.007
		165	6.32	165	4.313
		166	5.411	166	4.007
		167	1	167	4.458
		168	1	168	3.001
		169	8.404	169	3.003
		170	3.005	170	5.007
		171	4.039	171	6.096
		172	4.029	172	5.013
		173	30.998	173	5.14
		174	22.505	174	5.005
		175	3.028	175	3.003
		176	6.037	176	5.029
		177	14.167	177	4.013
		178	5.156	178	5.004
		179	10.478	179	3.002
		180	5.021	180	4.003
		181	4.029	181	6.104
		182	2	182	5.033
		183	3.001	183	4.004
		184	4.028	184	6.006
		185	3.001	185	4.005
		186	4.003	186	5.004
		187	3.001	187	5.075
		188	5.011	188	4.174
		189	3.021	189	3.005
		190	4.022	190	3.001
		191	2	191	4.004
		192	4.013	192	5.004
		193	2.001	193	6.323
		194	7.098	194	7.025
		195	9.123	195	9.123
		196	13.482	196	5.015
		197	11.24	197	3.001
		198	4.002	198	4.009
		199	3.004	199	4.003
		200	35.353	200	5.034
		201	6.023	201	4.895
		202	5.478	202	6.007
		203	7.16	203	4.176
		204	11.384	204	5.026
		205	4.002	205	5.104
		206	4.004	206	6.024
		207	46.843	207	5.062
		208	4.007	208	5.213
		209	2	209	4.005
		210	8.116	210	8.05
		211	37.168	211	8.045
		212	4.002	212	10.093
		213	2	213	3.003
		214	3.441	214	4.003
		215	12.19	215	7.292
		216	2.001	216	7.172
		217	2	217	5.024
		218	3.005	218	15.62
		219	7.042	219	5.154
		220	3.001	220	7.259
		221	4.011	221	11.177
		222	2.001	222	9.307
		223	6.014	223	4.005
		224	4.014	224	3.007
		225	4.006	225	3.001
		226	1	226	3.002
		227	4.002	227	5.157
		228	9.051	228	3.003
		229	2	229	4.003
		230	2	230	5.17
		231	4.003	231	6.041
		232	3.002	232	5.08
		233	3.001	233	5.008
		234	4.003	234	16.219
		235	3.001	235	1
		236	4.002	236	2.001
		237	5.025	237	2
		238	5.854	238	6.007
		239	3.002	239	4.003
		240	3.002	240	4.024
		241	4.02	241	3.002
		242	2.001	242	4.003
		243	8.167	243	3.003
		244	6.095	244	3.005
		245	47.612	245	2
		246	4.004	246	7.011
		247	8.033	247	2
		248	14.984	248	3.002
		249	5.135	249	5.017
		250	10.564	250	6.015
		251	14.592	251	4.059
		252	4.002	252	4.005
		253	5.008	253	8.143
		254	5.009	254	8.181
		255	5.009	255	11.105
		256	4.004	256	8.221
		257	5.039	257	4.005
		258	4.003	258	4.004
		259	5.006	259	3.019
		260	4.009	260	5.058
		261	5.057	261	2.001
		262	3.003	262	3.002
		263	3.001	263	3.003
		264	1	264	3.006
		265	3.002	265	6.176
		266	1	266	3.003
		267	1	267	3.004
		268	3.002	268	8.107
		269	3.001	269	5.01
		270	2.001	270	5.095
		271	5.02	271	3.003
		272	20.272	272	3.001
		273	6.017	273	5.028
		274	4.066	274	4.005
		275	7.467	275	4.039
		276	6.529	276	3.002
		277	11.961	277	7.013
		278	11.873	278	15.586
		279	4.026	279	8.148
		280	4.004	280	3.004
		281	3.306	281	6.129
		282	4.139	282	7.013
		283	4.28	283	12.569
		284	4.042	284	5.237
		285	4.002	285	4.009
		286	10.512	286	9.405
		287	6.03	287	7.031
		288	8.509	288	4.198
		289	2
		290	5.004
		291	10.437
		292	7.045
		293	4.794
		294	12.73
		295	5.034
		296	5.034
		297	18.527
		298	6.031
		299	3.002
		300	6.026
		301	6.053
		302	5.004
		303	2.002
		304	5.082
		305	3.001
		306	4.004
		307	4.033
		308	6.011
		309	4.047
		310	5.049
		311	9.89
		312	17.575
		313	8.251
		314	6.042
		315	8.068
		316	3.001
		317	10.435
		318	3.003
		319	2.003
		320	5.025
		321	5.04
		322	9.705
		323	5.019
		324	10.032
		325	3.013
		326	7.865
		327	4.035
		328	3.017
		329	4.316
		330	2
		331	3.002
		332	2
		333	5.188
		334	26.941
		335	14.776
		336	3.001
		337	6.006
		338	4.107
		339	5.022
		340	2
		341	6.046
		342	3.039
		343	4.002
		344	8.213
		345	8.656
		346	10.189
		347	4.032
		348	7.025
		349	2
		350	3.031
		351	3.001
		352	3.001
		353	1
		354	4.003
		355	5.037
		356	9.715
		357	27.672
		358	7.796
		359	32.585
		360	8.647
		361	4.003
		362	5.012
		363	2
		364	3.004
		365	5.166
		366	4.244
		367	5.03
		368	4.003
		369	5.654
		370	10.413
		371	8.62
		372	5.018
		373	6.044
		374	6.063
		375	8.085
		376	12.592
		377	27.125
		378	5.003
		379	4.399
		380	3.015
		381	2.067
		382	6.055
		383	3.001
		384	3.001
		385	3.098
		386	9.564
		387	4.004
		388	6.213
		389	4.005
		390	4.069
		391	3.003
		392	2
		393	5.026
		394	9.161
		395	2.202
		396	6.157
		397	6.041
		398	4.003
		399	6.445
		400	15.933
		401	3.002
		402	2.001
		403	17.871
		404	14.239
		405	7.046
		406	3.002
		407	1
		408	3.002
		409	5.012
		410	6.029
		411	6.029
		412	4.003
		413	5.127
		414	1
		415	4.01
		416	5.034
		417	7.285
		418	5.025
		419	5.008
		420	3.001
		421	9.038
		422	4.004
		423	5.006
		424	4.005
		425	4.003
		426	1
		427	6.005
		428	6.035
		429	6.007
		430	5.006
		431	8.399
		432	7.792
		433	2
		434	6.165
		435	31.415
		436	8.29
		437	9.259
		438	5.007
		439	3.001
		440	4.098
